# Supplementary material for: Non-enzymatic amperometric glucose sensing by novel Cu-MOF synthesized at room temperature
Source: Royal Society of Chemistry journal article supplement (doi:10.1039/d3ma00551h), 2023-12-12
Supplement: d3ma00551h1.pdf [file d3ma00551h1.pdf]

ESI: Electronic Supporting Information

**Non-enzymatic Amperometric Glucose Sensing by novel Cu-MOF Synthesized at Room  
Temperature**

Sondes Guesmi<sup>1</sup>, Kaveh Moulae<sup>2</sup>, Viviana Bressi<sup>2</sup>, Hamza Kahri<sup>1</sup>, Amani Khaskhoussi<sup>2</sup>, Claudia  
Espro<sup>2</sup>, Houcine Barhoumi<sup>1</sup>, Giovanni Neri<sup>2\*</sup>

<sup>1</sup> Laboratory of Interfaces and Advanced Materials, Faculty of Sciences, University of Monastir,  
Tunisia

<sup>2</sup> Department of Engineering, University of Messina, Messina, Italy

**\*corresponding author:** [giovanni.neri@unime.it](mailto:giovanni.neri@unime.it)

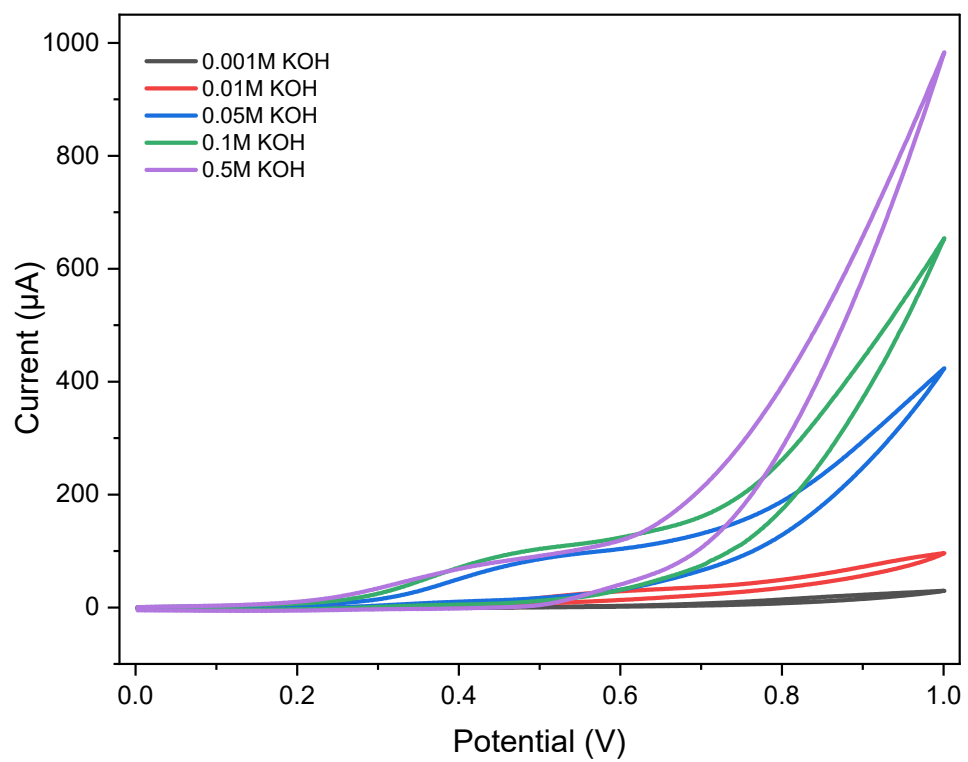

**Fig. S1.** Effect of KOH concentration. CVs of 1 mM Glu at Cs/Cu-MOF/SPCE in various concentrations of KOH

**(b)**

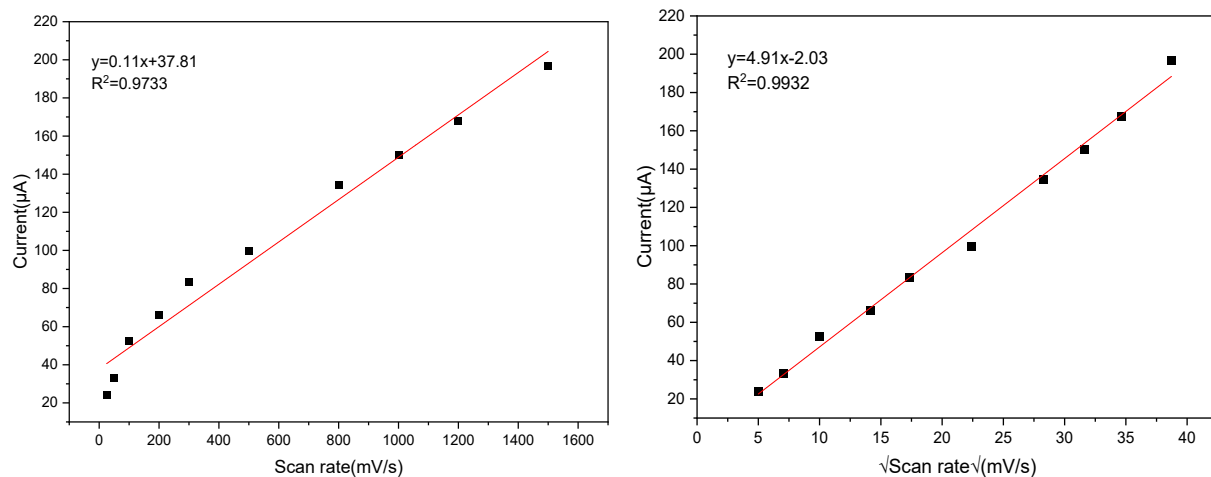

**Fig. S2.** a) CVs curves of glucose oxidation in 0.05M KOH at Cs/Cu-MOF/SPCE at different scan rates; b) Linear fitting of peak current versus square root of scan rate or linear scan rate.

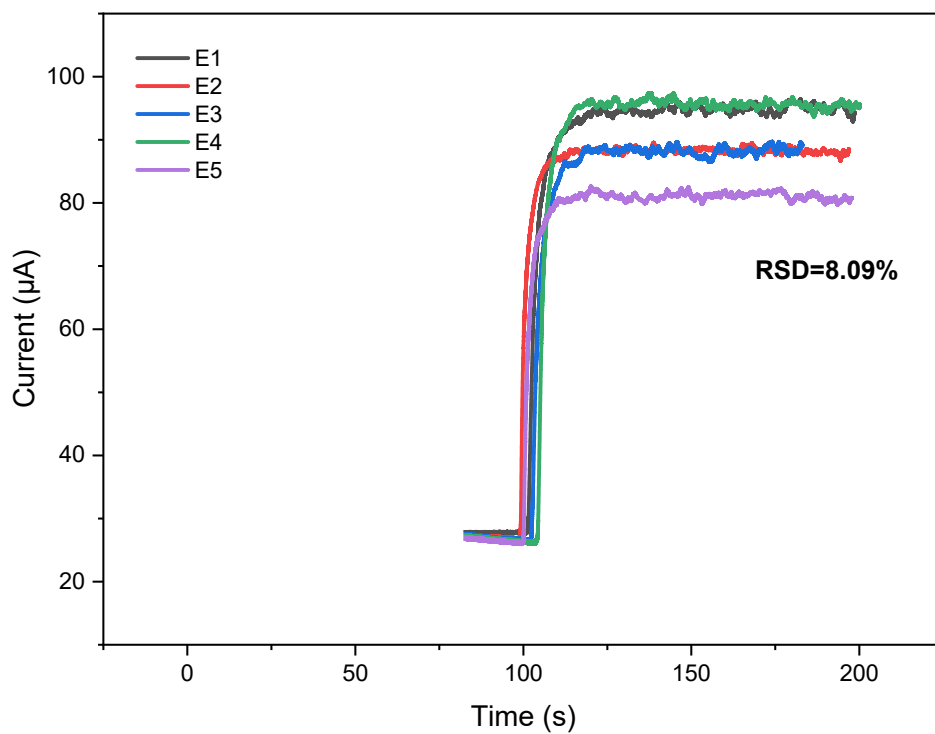

**Fig. S3.** Reproducibility test using five different Cs/Cu-MOF/SPCE sensors.
